# Supplementary material
Source: PubMed Central journal article supplement (PMC2798631)
Supplement: supp_76_1_356__1.pdf [file supp_76_1_356__1.pdf]

## Supplemental material for

# Effect of glycosylation and additional domains on thermostability of a family 10 xylanase of *Thermopolyspora flexuosa*

Sasikala Anbarasan, Janne Jänis, Marja Paloheimo, Mikko Laitaoja, Minna Vuolanto, Johanna Karimäki, Pirjo Vainiotalo, Matti Leisola and Ossi Turunen

### Contents:

- I. High-resolution mass spectrometry: experimental details
- II. Accurate mass data for the observed protein forms of *T.reesei* and *E.coli* XYN10A
- III. On-line digestion mass spectra for *T.reesei* and *E.coli* XYN10A
- IV. On-line digestion of XYN10A: List of observed peptic peptides
- V. CID measurement of glycopeptide A: List of observed fragment ions

### I. High-resolution mass spectrometry: experimental details

All experiments were performed with a 4.7-T hybrid quadrupole–Fourier transform ion cyclotron resonance (FT-ICR) mass spectrometer (APEX-Qe™; Bruker Daltonics, Billerica, MA, USA), interfaced to an electrospray ionization (ESI) source (Apollo-II™). Enzyme samples were further desalted by a Sephadex G-25 columns (PD-10; Amersham Pharmacia Bio-tech, Sweden), diluted to a ~10 μM concentration with acetonitrile/water/acetic acid (49.5:49.5:1.0, v/v) solution and directly infused at a flow rate of 1.5 μL/min. ESI-generated ions at  $m/z$  50-3000 were externally accumulated in the hexapole ion trap (collision cell) for 1.0 s and transferred to an Infinity ICR cell for trapping, excitation and detection. For each spectrum, a total of 256 co-added (1-Mword) time-domain transients were fast Fourier-transformed prior to magnitude calculation and external frequency-to- $m/z$  calibration (ES Tuning Mix; Agilent Technologies, Palo Alto, CA, USA). On-line digestion was performed by following a previously reported protocol (Marie *et al.*, 2000) that was slightly modified (Jänis J. *et al.*, unpublished results). The attempts to reduce disulfides prior to digestion were made by the protocol described earlier (Scigelova, *et al.*, 2001). For collision-induced dissociation (CID) mass spectra, peptide ions of interest were mass-selectively accumulated in the hexapole (quadrupole isolation width 10  $m/z$ -units) at the static argon pressure of  $\sim 4.0 \times 10^{-6}$  mbar and the hexapole DC-offset was lowered from 0 to -15 V. All data were acquired and processed with the use of Bruker XMASS 7.0.8 software. CID mass spectra were interpreted with the help of GPMAW 8.0 software (Lighthouse Data, Odense, Denmark).

### References:

- Marie, G., Serani, L., and Laprevote, O. 2000. An on-line protein digestion device for rapid peptide mapping by electrospray mass spectrometry, *Anal. Chem.* 72:5423-5430.
- Scigelova, M., Green, P. S., Giannokopoulos, A. E., Rodger, A., Crout, D. H. G., and Derrick, P. J. 2001. A practical protocol for the reduction of disulfide bonds in proteins prior to analysis by mass spectrometry, *Eur. J. Mass Spectrom.* 7: 29-34.

## II. Accurate mass data for the observed protein forms of *T.reesei* and *E.coli* XYN10A

**Table S1.** Experimental and calculated masses for the different protein forms detected in the ESI FT-ICR mass spectra of XYN10A with 6xHis-tag expressed in *E. coli* and XYN10A expressed *T. reesei*

| <i>T. reesei</i> |                               |                               |                    |                              |
|------------------|-------------------------------|-------------------------------|--------------------|------------------------------|
| Protein form     | mass (exptl), Da <sup>1</sup> | mass (calcd), Da <sup>1</sup> | $\Delta$ mass, Da  | Assignment                   |
| 1                | 34120.76 $\pm$ 0.05           | 34120.73                      | –                  | Full construct               |
| 2                | 34323.93 $\pm$ 0.08           | 34323.92                      | + 203.17           | + GlcNAc                     |
| 3                | 34486.03 $\pm$ 0.06           | 34486.06                      | + 162.10           | + Man                        |
| 4                | 34642.32 $\pm$ 0.06           |                               | + 156.29           |                              |
| 5                | 34722.25 $\pm$ 0.13           |                               | + 79.93            |                              |
| 6                | 34884.26 $\pm$ 0.04           |                               | + 162.01           | + Man                        |
| <i>E.coli</i>    |                               |                               |                    |                              |
| Protein form     | mass (exptl), Da <sup>1</sup> | mass (calcd), Da <sup>1</sup> | $\Delta$ mass (Da) | Assignment                   |
| 1                | 34943.25 $\pm$ 0.15           | 34942.93                      | –                  | Full construct (His6-tagged) |

<sup>1</sup>Most abundant isotopic masses averaged over observed charge-state distributions

## III. On-line digestion mass spectra

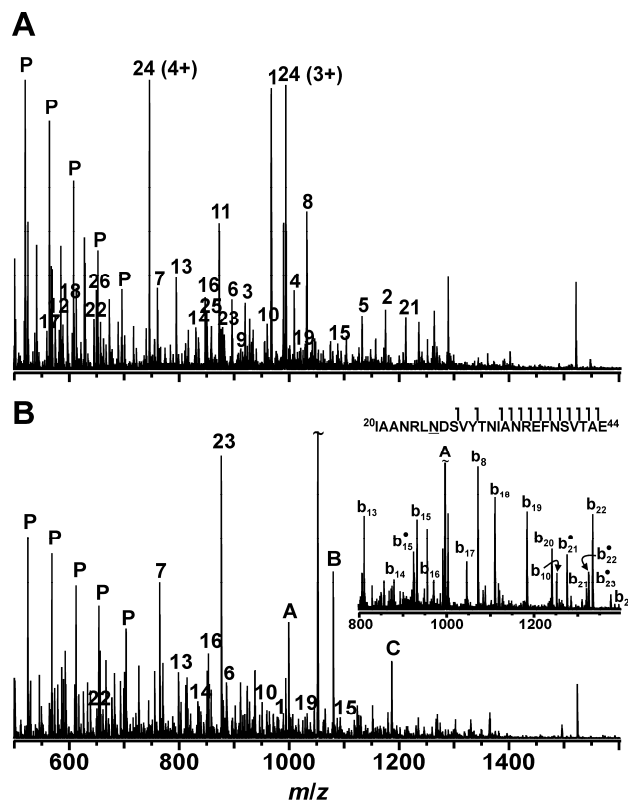

**Figure S1:** ESI FT-ICR mass spectra of the peptic peptides arising from on-line pepsin digestion of the catalytic domain of XYN10A expressed in *E. coli* (A) and *T. reesei* (B). The identified peptic peptides are assigned by numbers (1-26) and three observed glycopeptides as A, B and C (for the mass data, see Table S2) The inset in B shows the CID mass spectrum of a triple-charged glycopeptide A (aa 20-44), observed at  $m/z$  ~996. The sequence of A is shown above, with the glycosylated Asn26 underlined. All b-type fragment ions were double-charged, except  $b_8$  and  $b_{10}$ . Ions marked with • are b-H<sub>2</sub>O fragment ions. Signals from PEG impurity in the samples are assigned as P.

#### IV. On-line digestion: *E.coli* XYN 10A

**Table S2.** List of peptic peptides detected in the on-line digestion of *E.coli* XYN 10A

| Peptide number | <i>m/z</i> (exptl) | <i>m/z</i> (calcd) | error (ppm) | Residues & Sequence From-To                       |
|----------------|--------------------|--------------------|-------------|---------------------------------------------------|
| 1              | 1932.9519          | 1932.9442          | 4.0         | 1 19 AASTLAEGAAQHNRYFGVA                          |
| 2              | 4696.3356          | 4696.3018          | 7.2         | 1 44 AASTLAEGAAQHNRYFGVAIAANRLNDSVYTNIANREFNSVTAE |
| 3              | 2781.3855          | 2781.3682          | 6.2         | 20 44 IAANRLNDSVYTNIANREFNSVTAE                   |
| 4              | 3024.4796          | 3024.4537          | 8.6         | 20 46 IAANRLNDSVYTNIANREFNSVTAENE                 |
| 5              | 4526.2151          | 4526.2104          | 1.0         | 20 59 IAANRLNDSVYTNIANREFNSVTAENEMKIDATEPQQGRF    |
| 6              | 1762.8381          | 1762.8308          | 4.1         | 45 59 NEMKIDATEPQQGRF                             |
| 7              | 1519.7530          | 1519.7453          | 5.1         | 47 59 MKIDATEPQQGRF                               |
| 8              | 3093.5293          | 3093.5059          | 7.6         | 88 114 QQPQWMQNLGQALRQAMINHIQGVMS                 |
| 9              | 1837.9441          | 1837.9363          | 4.2         | 114 128 SYYRGKIPWDVVNE                            |
| 10             | 1908.9868          | 1908.9734          | 7.0         | 114 129 SYYRGKIPWDVVNEA                           |
| 11             | 1750.9145          | 1750.9043          | 5.8         | 115 128 YYRGKIPWDVVNE                             |
| 12             | 1146.6255          | 1146.6186          | 6.0         | 116 124 YRGKIPWD                                  |
| 13             | 1587.8496          | 1587.8409          | 5.5         | 116 128 YRGKIPWDVVNE                              |
| 14             | 1658.8852          | 1658.8780          | 4.4         | 116 129 YRGKIPWDVVNEA                             |
| 15             | 3262.6399          | 3262.6232          | 5.1         | 116 143 YRGKIPWDVVNEAFEDGNSGRRRDSNL               |
| 16             | 1692.8035          | 1692.7928          | 6.3         | 129 143 AFEDGNSGRRRDSNL                           |
| 17             | 1117.5198          | 1117.5152          | 4.2         | 144 152 QRTGNDWIE                                 |
| 18             | 1209.5880          | 1209.5812          | 5.6         | 178 188 NAAKTQAVYNM                               |
| 19             | 4112.0248          | 4111.9996          | 6.1         | 247 282 YASVIRDCLAVDRCTGITVWGVDRSDSWRSYQNPLL      |
| 20             | 2720.2917          | 2720.2799          | 4.4         | 251 274 IRDCLAVDRCTGITVWGVDRSDSW                  |
| 21             | 3691.8181          | 3691.7988          | 5.2         | 251 282 IRDCLAVDRCTGITVWGVDRSDSWRSYQNPLL          |
| 22             | 1297.6117          | 1297.6051          | 5.1         | 283 293 FDNNGNKKQAY                               |
| 23             | 1743.8637          | 1743.8580          | 3.3         | 283 297 FDNNGNKKQAYYAVL                           |
| 24             | 2979.4118          | 2979.4025          | 3.1         | 283 307 FDNNGNKKQAYYAVLDALNHHHHHH                 |
| 25             | 1699.8126          | 1699.8080          | 2.7         | 294 307 YAVLDALNHHHHHH                            |
| 26             | 1253.5590          | 1253.5551          | 3.1         | 298 307 DALNHHHHHH                                |

## V. Collision-induced dissociation (CID) measurement of glycopeptide A

**Table S3.** List of observed fragment ions from the CID measurement of a triply-charged glycopeptide A, observed at  $m/z$  995.83 in the on-line digestion of *T.reesei* XYN10A

| Fragment ion <sup>1</sup>         | $m/z$ (exptl) | $m/z$ (calcd) | error (ppm) |
|-----------------------------------|---------------|---------------|-------------|
| b <sub>23</sub>                   | 1384.203      | 1384.186      | 12.3        |
| b <sub>23</sub> -H <sub>2</sub> O | 1375.190      | 1375.181      | 6.7         |
| b <sub>22</sub>                   | 1333.676      | 1333.662      | 10.5        |
| b <sub>22</sub> -H <sub>2</sub> O | 1324.669      | 1324.657      | 8.9         |
| b <sub>21</sub>                   | 1284.136      | 1284.128      | 6.5         |
| b <sub>21</sub> -H <sub>2</sub> O | 1275.131      | 1275.123      | 6.7         |
| b <sub>20</sub>                   | 1240.624      | 1240.612      | 9.2         |
| b <sub>19</sub>                   | 1183.597      | 1183.591      | 5.1         |
| b <sub>18</sub>                   | 1110.063      | 1110.057      | 5.7         |
| b <sub>17</sub>                   | 1045.542      | 1045.535      | 6.7         |
| b <sub>16</sub>                   | 967.4831      | 967.4846      | 1.6         |
| b <sub>14</sub>                   | 874.9462      | 874.9446      | 1.8         |
| b <sub>13</sub>                   | 818.4048      | 818.4026      | 2.7         |
| b <sub>10</sub>                   | 1257.653      | 1257.644      | 7.2         |
| b <sub>8</sub>                    | 1071.550      | 1071.544      | 5.9         |

<sup>1</sup>All fragment ions are doubly-charged, except b<sub>8</sub> and b<sub>10</sub> that are singly-charged.
